# Supplementary material
Source: Royal Society of Chemistry journal article supplement (doi:10.1039/d5ew01306b)
Supplement: d5ew01306b1.pdf [file d5ew01306b1.pdf]

**Phycoremediation of textile wastewater using native algal isolates:  
pollutant removal, nutrient recovery, and ecofriendly resource valorization**

**Durgadevi Selvaraj and M. Arivazhagan\***

\*Corresponding author: Mail ID: [ariva@nitt.edu](mailto:ariva@nitt.edu); [arivanitt@gmail.com](mailto:arivanitt@gmail.com)

**Supplementary data**

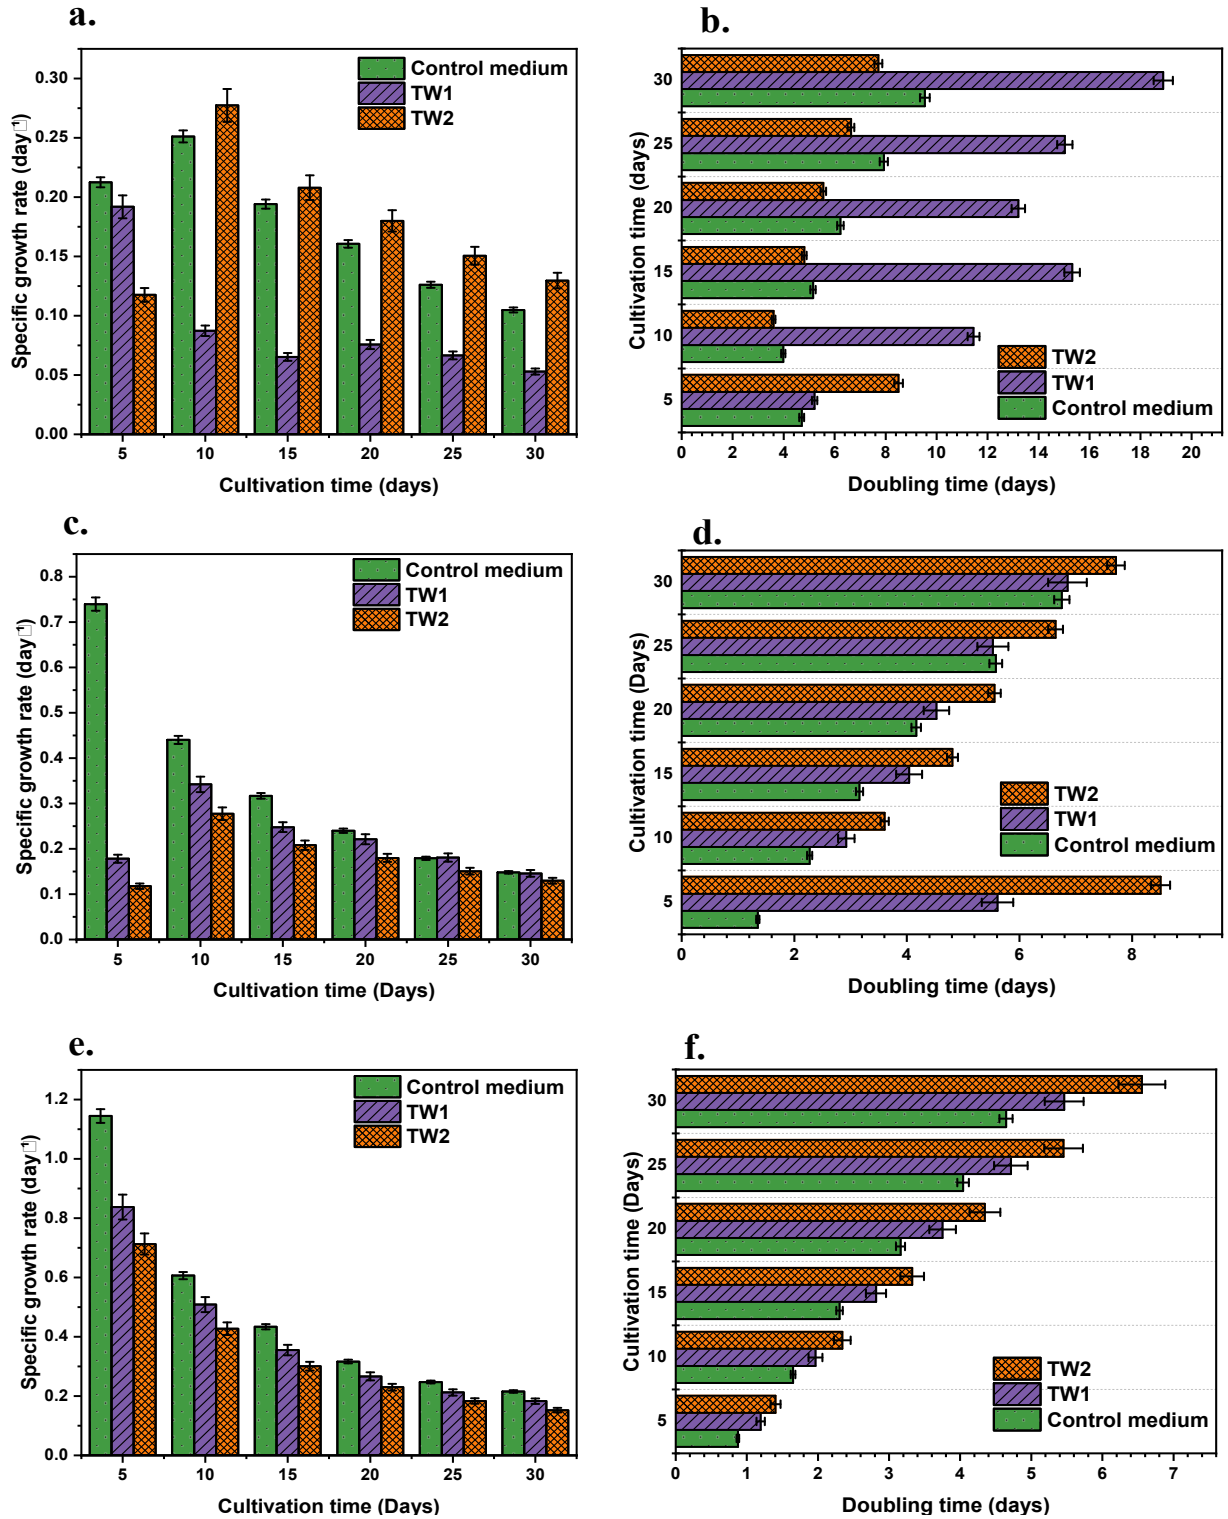

Figure 1S. Specific growth rate and doubling time of isolated algal strains (CS, DS, and CM) cultivated for 30 days in control medium, TW1 and TW2: a. Specific growth rate of CS, b. Doubling time of CS, c. Specific growth rate of DS, d. Doubling time of DS, e. Specific growth rate of CM, and f. Doubling time of CM.

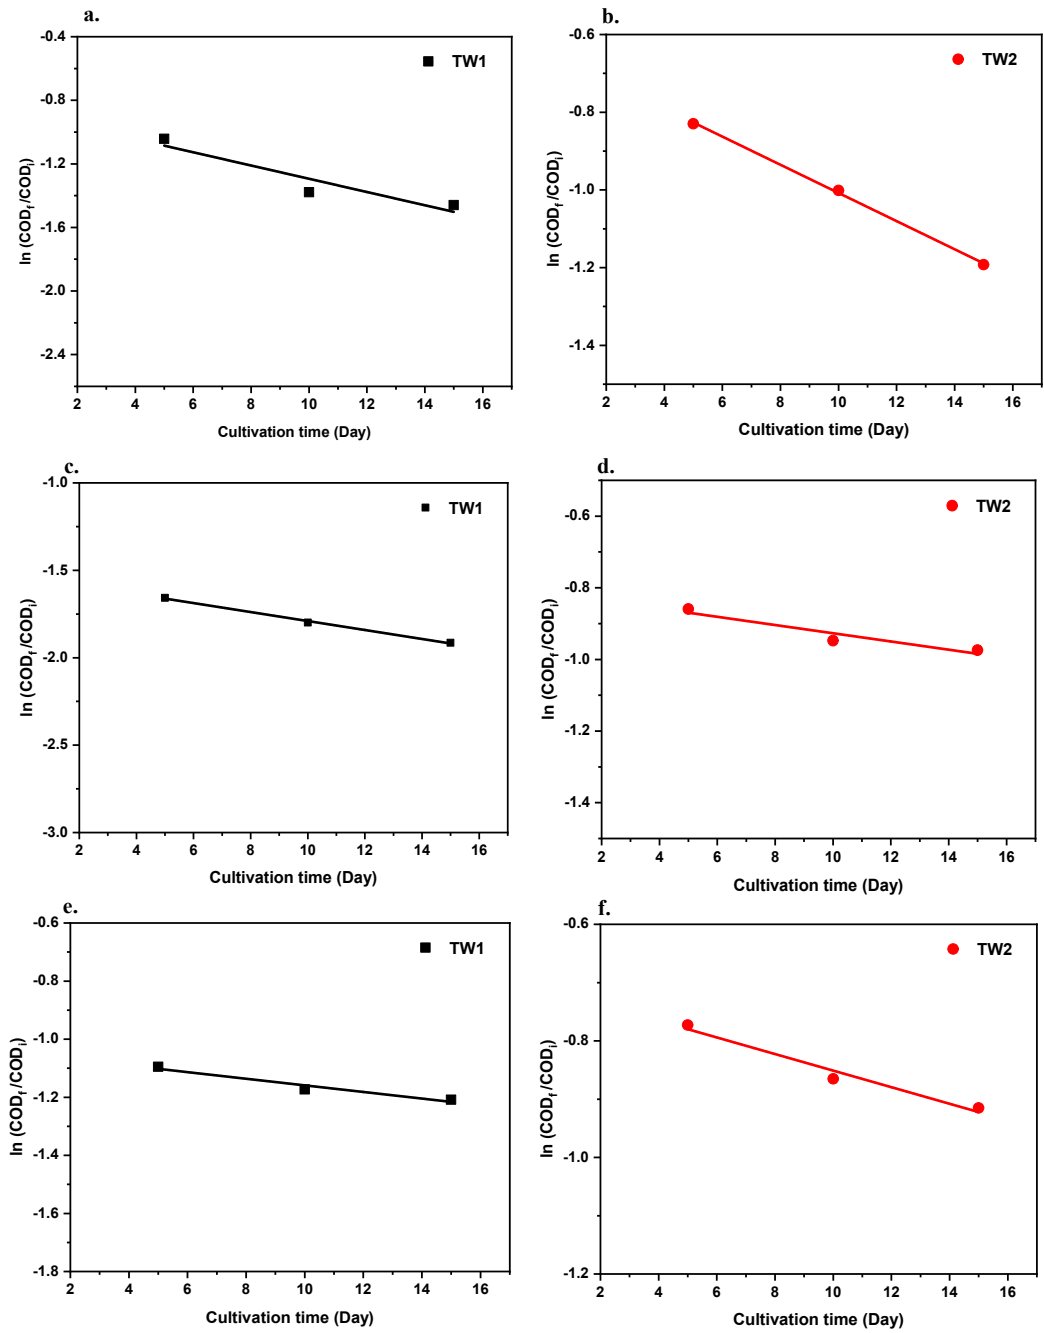

Figure 2S First-order kinetic models for the COD removal: a. CS-TW1, b. CSTW2, c. DS-TW1, d. DS-TW2, e. CM-TW1, and f. CM-TW2

**Table 1S Analytical precision and reproducibility of experimental measurements expressed as Coefficient of Variation (CV%)**

| Isolates Type | Wastewater Type | COD (mg L <sup>-1</sup> ) | Nitrate (mg L <sup>-1</sup> as NO <sub>3</sub> <sup>-</sup> ) | Ammonia (mg L <sup>-1</sup> as NH <sub>4</sub> <sup>+</sup> ) | Phosphate (mg L <sup>-1</sup> as PO <sub>4</sub> <sup>3-</sup> ) |
|---------------|-----------------|---------------------------|---------------------------------------------------------------|---------------------------------------------------------------|------------------------------------------------------------------|
| CS            | TW1             | 3.45                      | 3.51                                                          | 4.88                                                          | 3.47                                                             |
| CS            | TW2             | 3.45                      | 4.45                                                          | 1.76                                                          | 3.45                                                             |
| DS            | TW1             | 3.69                      | 3.55                                                          | 3.47                                                          | 3.34                                                             |
| DS            | TW2             | 3.45                      | 3.43                                                          | 3.52                                                          | 4.56                                                             |
| CM            | TW1             | 3.33                      | 3.42                                                          | 3.41                                                          | 3.45                                                             |
| CM            | TW2             | 3.47                      | 3.41                                                          | 3.41                                                          | 3.45                                                             |

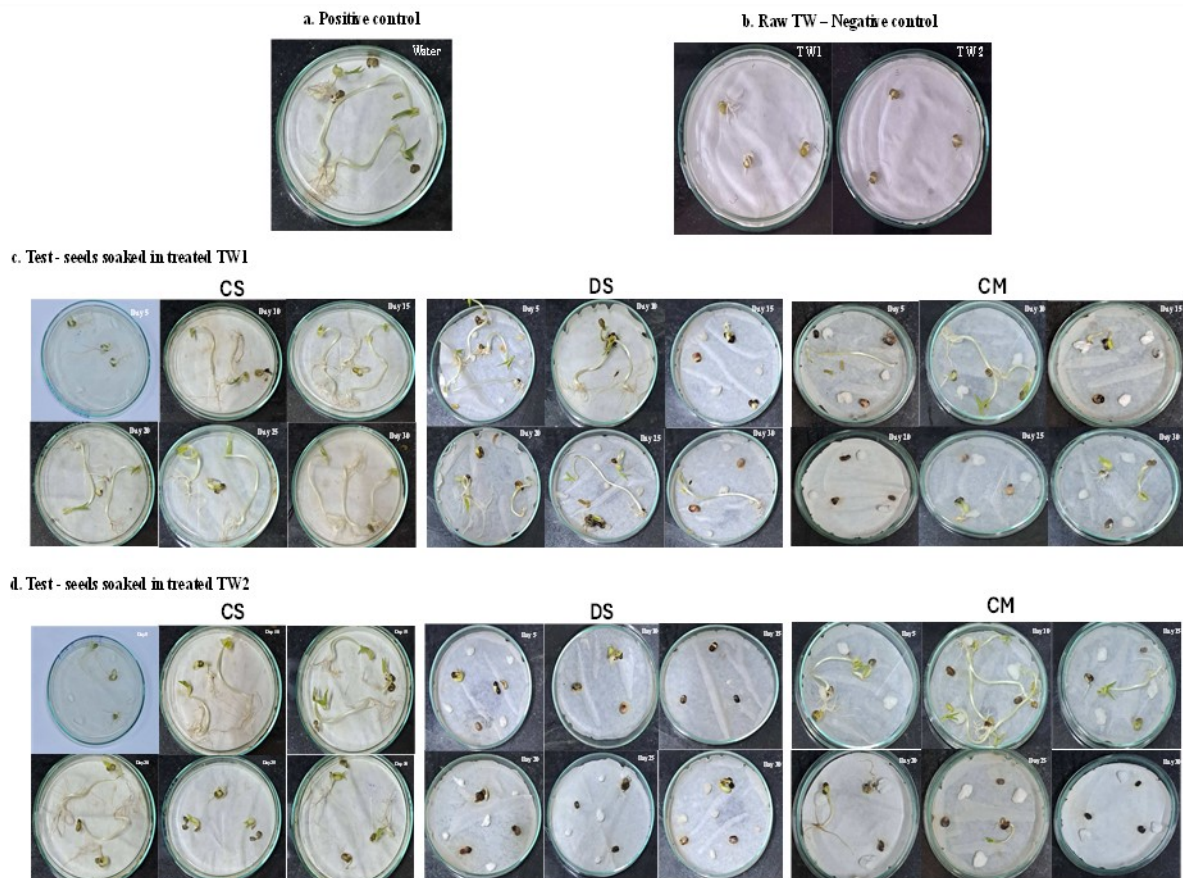

Figure 3S. Seed germination study with treated and untreated wastewater. (a) Germination in water (positive control), (b) Germination in untreated TW1 and TW2 (negative controls), (c) Germination in treated TW1 on days 5, 10, 15, 20, 25, and 30, (d) Germination in treated TW2 on days 5, 10, 15, 20, 25, and 30

Table 2S. Effect of treated untreated TW1 and TW2 on germination parameters

|                |                  | TW 1                                         |                                   |                           |                                     | TW 2                                         |                                   |                       |                                     |
|----------------|------------------|----------------------------------------------|-----------------------------------|---------------------------|-------------------------------------|----------------------------------------------|-----------------------------------|-----------------------|-------------------------------------|
|                |                  | Seed<br>germinatio<br>n<br>percentage<br>(%) | Relative<br>root<br>growth<br>(%) | Germinatio<br>n index (%) | Seedling<br>vigor<br>index<br>(SVI) | Seed<br>germinatio<br>n<br>percentage<br>(%) | Relative<br>root<br>growth<br>(%) | Germinatio<br>n index | Seedling<br>vigor<br>index<br>(SVI) |
| <b>Control</b> | TWW              | 100.00                                       | 30.00                             | 30.00                     | 210.00                              | 66.67                                        | 18.00                             | 12.00                 | 93.33                               |
|                | 5th day treated  | 100.00                                       | 66.67                             | 66.67                     | 450.00                              | 100.00                                       | 24.67                             | 24.67                 | 250.00                              |
|                | 10th day treated | 100.00                                       | 85.33                             | 85.33                     | 1170.00                             | 100.00                                       | 37.33                             | 37.33                 | 296.67                              |
|                | 15th day treated | 100.00                                       | 98.00                             | 98.00                     | 1383.33                             | 100.00                                       | 96.67                             | 96.67                 | 1223.33                             |
|                | 20th day treated | 100.00                                       | 97.33                             | 97.33                     | 1373.33                             | 100.00                                       | 89.33                             | 89.33                 | 1043.33                             |
|                | 25th day treated | 100.00                                       | 74.00                             | 74.00                     | 1050.00                             | 100.00                                       | 80.00                             | 80.00                 | 680.00                              |
| <b>CS</b>      | 30th day treated | 100.00                                       | 56.00                             | 56.00                     | 950.00                              | 100.00                                       | 80.00                             | 80.00                 | 720.00                              |
| <b>DS</b>      | 5th day treated  | 66.67                                        | 36.67                             | 24.44                     | 551.11                              | 33.33                                        | 10.00                             | 3.33                  | 150.00                              |

|           |                  |        |       |       |         |        |       |       |         |
|-----------|------------------|--------|-------|-------|---------|--------|-------|-------|---------|
|           | 10th day treated | 66.67  | 60.00 | 40.00 | 853.33  | 33.33  | 46.51 | 15.50 | 66.67   |
|           | 15th day treated | 100.00 | 68.67 | 68.67 | 1220.00 | 33.33  | 23.26 | 7.75  | 33.33   |
|           | 20th day treated | 66.67  | 64.00 | 42.67 | 746.67  | 33.33  | 23.26 | 7.75  | 33.33   |
|           | 25th day treated | 66.67  | 70.00 | 46.67 | 576.67  | 0.00   | 0.00  | 0.00  | 0.00    |
|           | 30th day treated | 66.67  | 22.00 | 14.67 | 173.33  | 0.00   | 0.00  | 0.00  | 0.00    |
|           | 5th day treated  | 100.00 | 42.67 | 42.67 | 810.00  | 100.00 | 60.00 | 60.00 | 1150.00 |
|           | 10th day treated | 100.00 | 39.33 | 39.33 | 586.67  | 100.00 | 93.33 | 93.33 | 1293.33 |
|           | 15th day treated | 33.33  | 36.00 | 12.00 | 186.67  | 100.00 | 54.00 | 54.00 | 743.33  |
|           | 20th day treated | 33.33  | 10.00 | 3.33  | 133.33  | 66.67  | 55.00 | 36.67 | 446.67  |
|           | 25th day treated | 33.33  | 10.00 | 3.33  | 316.67  | 33.33  | 36.00 | 12.00 | 153.33  |
| <b>CM</b> | 30th day treated | 0      | 0     | 0     | 0.00    | 0      | 0     | 0     | 0.00    |
